# Supplementary material
Source: PubMed Central journal article supplement (PMC6622520)
Supplement: jcsm.15.7.947s1.pdf [file jcsm.15.7.947s1.pdf]

Table S1: Additional PSG Night and Treatment Measures

|                                         | Baseline     | SPT           | APAP           | P value |
|-----------------------------------------|--------------|---------------|----------------|---------|
| Heart Rate (bpm) (n = 106)              | 72.1 ± 12.03 | 72.45 ± 12.59 | 72.4 ± 12.36   | .96     |
| Systolic BP (mmHg) (n = 105)            | 124.0 ± 15.2 | 123.89 ± 14.1 | 123.80 ± 14.88 | .942    |
| Diastolic BP (mmHg) (n = 105)           | 77.2 ± 12.0  | 78.82 ± 8.29  | 78.12 ± 8.61   | .448    |
| PLMSI (events/h)                        | 8.57 ± 14.1  | 11.23 ± 20.78 | 12.10 ± 20.31  | .372    |
| PLMAI (events/h)                        | 1.99 ± 3.08  | 2.31 ± 3.46   | 3.31 ± 5.44    | .0101   |
| APAP Mean Pressure (cmH <sub>2</sub> O) | –            | –             | 6.8 ± 1.5      | –       |
| Mean Disease Alleviation, %*            | –            | 55 ± 32       | 63 ± 29        | .038    |

\*Mean Disease Alleviation is calculated as adjusted compliance (average device use over 6 weeks in minutes / minutes of sleep on PSG night) × therapeutic efficacy ((baseline AHI – Treated AHI) / baseline AHI) × 100. AHI = apnea-hypopnea index, APAP = auto-adjusting positive airway pressure, BP = blood pressure, PLMAI = periodic limb movement arousal index, PLMSI = periodic limb movement index, PSG = polysomnography, SPT = sleep position treatment.

Table S2: SF-36 v2 Domains

|                      | Baseline      | SPT           | APAP          | P value |
|----------------------|---------------|---------------|---------------|---------|
| Physical functioning | 83.0 ± 20.43  | 83.82 ± 19.42 | 83.78 ± 19.89 | .972    |
| Role-Physical        | 76.48 ± 25.43 | 84.32 ± 21.02 | 85.57 ± 19.45 | .483    |
| Bodily Pain          | 71.28 ± 22.13 | 73.39 ± 21.67 | 75.05 ± 19.36 | .266    |
| General Health       | 69.90 ± 19.50 | 68.60 ± 18.46 | 69.93 ± 18.77 | .235    |
| Vitality             | 48.86 ± 20.58 | 56.53 ± 18.38 | 59.49 ± 16.30 | .055    |
| Social Functioning   | 82.0 ± 23.54  | 86.12 ± 21.74 | 88.88 ± 16.17 | .088    |
| Role-Emotional       | 82.50 ± 25.27 | 88.86 ± 19.43 | 89.62 ± 17.71 | .600    |
| Mental Health        | 75.50 ± 16.18 | 77.45 ± 16.48 | 78.55 ± 13.65 | .372    |

APAP = auto-adjusting positive airway pressure, SPT = sleep position treatment.

Table S3: Adverse Events

| Event Type, % (n)                                 | SPT          | APAP           |
|---------------------------------------------------|--------------|----------------|
| Subjects reporting at least one device related AE | 4.2% (5/117) | 18.8% (22/117) |
| Nasal Irritation                                  | –            | 12.8% (15/117) |
| Dry Throat/Mouth                                  | –            | 3.4% (4/117)   |
| Facial Irritation                                 | –            | 1.7% (2/117)   |
| Mouth Irritation                                  | –            | 1.7% (2/117)   |
| Ear Irritation                                    | –            | < 1% (1/117)   |
| Back, Shoulder or Neck Pain                       | 3.4% (4/117) | –              |
| Abdominal Skin Irritation                         | < 1% (1/117) | –              |

APAP = auto-adjusting positive airway pressure, SPT = sleep position treatment.
